# Greater Response to Placebo in Children Than in Adults: A Systematic Review and Meta-Analysis in Drug-Resistant Partial Epilepsy

Sylvain Rheims<sup>1,2</sup>, Michel Cucherat<sup>3</sup>, Alexis Arzimanoglou<sup>2,4</sup>, Philippe Ryvlin<sup>1,2,5\*</sup>

1 Department of Functional Neurology and Epileptology, Hospices Civils de Lyon, Lyon, France, 2 CTRS INSERM-IDEE, Institute for Children and Adolescents with Epilepsy, Hospices Civils de Lyon, Lyon, France, 3 Department of Clinical Pharmacology, EA 643, Lyon-1 University, Laennec Faculty of Medicine, Lyon, France, 4 Department of Epileptology, Sleep and Pediatric Neurophysiology, Hospices Civils de Lyon, Lyon, France 5 INSERM U821, Lyon, France

**Funding:** The authors received no specific funding for this study.

**Competing Interests:** SR has received speaker fees from Pfizer. MC has no conflict of interest. AA has received speaker or consultant fees from Pfizer, Sanofi-Aventis, GlaxoSmithKline (GSK), Jansen-Cilag, UCB Pharma, Eisai, and Valeant. PR has received speaker fees from Cyberonics, Eisai, GSK, Janssen-Cilag, Novartis, Pfizer, Sanofi-Synthelabo, and UCB; and consultant fees from Cyberonics, GSK, Janssen-Cilag, Novartis, Pfizer, UCB, and Valeant.

**Academic Editor:** Terry Klassen, University of Alberta, Canada

**Citation:** Rheims S, Cucherat M, Arzimanoglou A, Ryvlin P (2008) Greater response to placebo in children than in adults: A systematic review and meta-analysis in drug-resistant partial epilepsy. *PLoS Med* 5(8): e166. doi:10.1371/journal.pmed.0050166

**Received:** October 1, 2007  
**Accepted:** June 25, 2008  
**Published:** August 12, 2008

**Copyright:** © 2008 Rheims et al. This is an open-access article distributed under the terms of the Creative Commons Attribution License, which permits unrestricted use, distribution, and reproduction in any medium, provided the original author and source are credited.

**Abbreviations:** AED, antiepileptic drug; CI, confidence interval; GBP, gabapentin; ITT, intention to treat; LEV, levetiracetam; LTG, lamotrigine; OXC, oxcarbazepine; RCT, randomized controlled trial; RR, relative risk; TPM, topiramate

\* To whom correspondence should be addressed. E-mail: ryvlin@cermep.fr

## ABSTRACT

### Background

Despite guidelines establishing the need to perform comprehensive paediatric drug development programs, pivotal trials in children with epilepsy have been completed mostly in Phase IV as a postapproval replication of adult data. However, it has been shown that the treatment response in children can differ from that in adults. It has not been investigated whether differences in drug effect between adults and children might occur in the treatment of drug-resistant partial epilepsy, although such differences may have a substantial impact on the design and results of paediatric randomised controlled trials (RCTs).

### Methods and Findings

Three electronic databases were searched for RCTs investigating any antiepileptic drug (AED) in the add-on treatment of drug-resistant partial epilepsy in both children and adults. The treatment effect was compared between the two age groups using the ratio of the relative risk (RR) of the 50% responder rate between active AEDs treatment and placebo groups, as well as meta-regression. Differences in the response to placebo and to active treatment were searched using logistic regression. A comparable approach was used for analysing secondary endpoints, including seizure-free rate, total and adverse events-related withdrawal rates, and withdrawal rate for seizure aggravation. Five AEDs were evaluated in both adults and children with drug-resistant partial epilepsy in 32 RCTs. The treatment effect was significantly lower in children than in adults (RR ratio: 0.67 [95% confidence interval (CI) 0.51–0.89];  $p = 0.02$  by meta-regression). This difference was related to an age-dependent variation in the response to placebo, with a higher rate in children than in adults (19% versus 9.9%,  $p < 0.001$ ), whereas no significant difference was observed in the response to active treatment (37.2% versus 30.4%,  $p = 0.364$ ). The relative risk of the total withdrawal rate was also significantly lower in children than in adults (RR ratio: 0.65 [95% CI 0.43–0.98],  $p = 0.004$  by metaregression), due to higher withdrawal rate for seizure aggravation in children (5.6%) than in adults (0.7%) receiving placebo ( $p < 0.001$ ). Finally, there was no significant difference in the seizure-free rate between adult and paediatric studies.

### Conclusions

Children with drug-resistant partial epilepsy receiving placebo in double-blind RCTs demonstrated significantly greater 50% responder rate than adults, probably reflecting increased placebo and regression to the mean effects. Paediatric clinical trial designs should account for these age-dependent variations of the response to placebo to reduce the risk of an underestimated sample size that could result in falsely negative trials.

*The Editors' Summary of this article follows the references.*

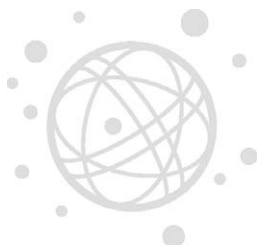

## Introduction

Epilepsy is a common disorder in children that often requires antiepileptic drug (AED) treatment for many years [1]. However, most AEDs have inadequate paediatric use information [2]. Indeed, AEDs are evaluated primarily in adult patients [3], and only a few randomised controlled trials (RCTs) have been performed in paediatric population [1]. Furthermore, despite reviews and guidelines establishing the importance of comprehensive drug development programs in children [2,4], most pivotal paediatric trials have been completed in Phase IV as a postapproval replication of adult data. Formulations, target doses, and expected effect size—which determines trial design and sample size—have been largely extrapolated from data collected in adult studies. Overall, the typical practice has been to extend the use of AEDs approved for adult epilepsy to children [5].

It has been shown that unpredictable differences may exist in drug metabolism and treatment response between children and adults [4,6]. For instance, the clearance of modern AEDs was found to be 20% to 170% higher in children than in adults [7]. Trial design could be affected as well—reluctance to recruit children with epilepsy into AEDs trials [8] might result in the selection of more severe epilepsy in paediatric than in adult RCTs. Furthermore, it has been suggested that the size of the placebo effect may be greater than usually expected in children with developmental disabilities [9] or migraine [10–12].

Whether age differences might exist in the treatment of drug-resistant partial epilepsy has never been investigated, despite the possibility that they may have an important impact on the design of paediatric trials. Specifically, a greater placebo effect in children than in adults would narrow the expected effect size of AED treatment in the former population, and it could lead to falsely negative RCT outcomes if the sample size is directly extrapolated from data collected in adult studies. To test this issue we performed a meta-analysis that compared AED efficacy in paediatric and adult RCTs.

## Materials and Methods

### Literature Search

See Text S1 for the review protocol and Text S2 for the QUOROM checklist.

Three electronic databases (MEDLINE, EMBASE, and the Cochrane Library) were searched from 1960 to 30 June 2007, for RCTs investigating any AED in the add-on treatment of drug-resistant partial epilepsy. A detailed search strategy is provided in Text S3. We searched for any additional studies (i) in the clinical trials registries ISRCTN (<http://isrctn.org/>), Current Controlled Trials (<http://www.controlled-trials.com/mrct/>), ClinicalTrials.gov (<http://www.ClinicalTrials.gov/>), and the Centre for Reviews and Dissemination (University of York, UK) Database of Abstracts of Reviews of Effectiveness (DARE; <http://www.crd.york.ac.uk/>); (ii) in the abstracts of the International Epilepsy Congress and the European Epilepsy Congress, the annual meeting of the American Epileptic Society (<http://www.aesnet.org/>), and the annual meeting of the American Academy of Neurology (<http://www.aan.com/>); (iii) in the references of all identified publications, including previous relevant meta-analyses and narrative reviews; and

(iv) by contacting the pharmaceutical companies involved in the development of modern licensed AEDs (including gabapentin, lamotrigine, levetiracetam, oxcarbazepine, pregabalin, tiagabine, topiramate, vigabatrin, and zonisamide) to exclude the possibility of relevant unpublished RCTs. No language restrictions were applied.

### Study Selection

The following criteria were used to select relevant RCTs: double-blind placebo-controlled design; patients with drug-resistant partial epilepsy with or without secondary generalization; adequate method of concealment of randomization (e.g., allocation of sequentially numbered sealed packages of medication, sealed opaque envelopes, telephone randomization) minimum baseline period 4 wk; minimum treatment phase 8 wk; efficacy as a primary endpoint; available data regarding the 50% responder rate; and number of withdrawals due to loss to follow up unlikely to affect the robustness of the results. Only drugs that have been evaluated in both adult and paediatric populations were included in further analyses.

We focused on drug-resistant partial epilepsy for several reasons. AEDs are first evaluated in patients with this condition before being tested in those with newly diagnosed epilepsy and refractory generalised epilepsies [3]. Furthermore, in RCTs in patients with newly diagnosed epilepsy, for ethical reasons AEDs are usually not compared to placebo but to another active treatment, whereas the nine RCTs performed in patients with refractory generalized epilepsy included a mixed population of children and adults without providing detailed results by age groups [13–21].

Drug-resistant partial epilepsy is defined by the International League Against Epilepsy (ILAE; <http://www.ilae.org/>) as an epileptic disorder characterised by: (i) seizures whose initial signs and symptoms indicate, or are consistent with, initial involvement of only part of one hemisphere [22] and (ii) persistent seizures during a minimum of 2 y despite treatment with trials of at least two different AEDs used at the therapeutic level [23–26]. However, the inclusion criteria used in RCTs are more stringent and usually require that the patient had failed three or more AEDs, while the actual average number of failed AEDs reported in those trials is often eight or more [23].

### Data Abstraction

The following information were extracted and entered independently into databases by two investigators (SR and PR): (i) *study design*—number of treatment arms, masking description, randomisation description, baseline description, titration period, and treatment period duration; (ii) *patients' characteristics*—age, type of seizures (partial or generalized), number of patients per arm, percentage of male sex, number of concomitant AEDs, and median seizure frequency during the baseline period (28 d); (iii) *intervention*—type and mean dose; (iv) *outcomes*—primary and secondary outcomes of the study, number of 50% responder patients per arm in an intention to treat (ITT) analysis on the whole treatment period, number of withdrawals per arm, and number of patients excluded from the published analysis with reasons.

For crossover studies, the first treatment period was treated as a parallel trial (i.e., only data from the first treatment period were used), and we discarded the second treatment

period. If data provided by the authors in tables differed slightly from published figures, the tabular data were used. If some information about study design or seizure outcomes were not reported, the authors were contacted to obtain the required information.

Trials were finally classified as paediatric or adult trials according to the age of the patients. Paediatric trials were defined by a maximum age of patients < 18 y [27]. Adult trials included a majority of patients  $\geq$  18 y, but some also included a few adolescents (age > 12 y [27]).

The results of the two resulting databases were compared and disagreements resolved by consensus. The quality of the reports was assessed by the Jadad score [28].

## Endpoints

The primary endpoint was the 50% responder rate (50% or greater reduction in seizure frequency during the treatment period as compared to baseline). All doses evaluated in trials were included. A secondary analysis was restricted to comparable doses between paediatric and adult studies. Dosages were considered “comparable” when the difference between paediatric and adult doses (expressed in mg/kg) was < 35%. In adult trials, where the target dose was never adjusted to body weight, we calculated the mean dose (mg/kg) by dividing the target dose (mg) by the average body weight of the population. When this latter information was not provided, we used the average body weight observed in the other trials included in our study (i.e., 70 kg).

Secondary endpoints included the seizure-free rate (no seizure during the entire treatment period); the total withdrawal rate, which included all dropouts occurring during the treatment period; the adverse events withdrawal rate, which included only dropouts related to side effects; and the withdrawal rate for seizure aggravation.

The 50% responder and withdrawal rates for active AEDs treatment and placebo arms were extracted in an ITT analysis on the whole treatment period.

The seizure-free rate for active AEDs treatment and placebo arms was extracted in a modified ITT analysis. Only patients who remained seizure free during the entire treatment period were considered to achieve seizure-free outcome. Indeed, the alternative use of standard ITT analysis, based on the principle of last observation carried forward, has been considered inappropriate for analysing seizure-free outcome [29].

## Statistical Methods

To evaluate efficacy of AEDs, we performed a meta-analysis that compared the 50% responder rate in active AEDs treatment group with the one observed in placebo group, and used the logarithm of relative risk method. This analysis was done separately in paediatric and in adult populations. Treatment effect and heterogeneity tests were performed, and a *p*-value of < 0.05 from a treatment effect test and of < 0.10 from a heterogeneity test (Cochrane *Q*-test) were considered statistically significant. We also used the  $I^2$  statistic and its 95% CI, which is independent of the number of studies and quantifies heterogeneity on a scale of 0% to 100%. Very large heterogeneity between studies is usually denoted by  $I^2$  values of 75% or more [30]. In the absence of a clear explanation for heterogeneity, a random-effect model for the relative risk (RR) was planned.

To compare efficacy of AEDs in children and in adults, we calculated for each drug the ratio of the RR of the 50% responder rate observed in paediatric and in adult trials. To further assess the robustness of this ratio, we used a meta-regression approach with the log odds ratio as a dependent variable and a restricted maximum likelihood method for the estimation. Subanalyses were planned a priori to determine whether doses of AEDs or methodological quality was responsible for significant heterogeneity. The same statistical methods were used to analyse the seizure-free rate, the total withdrawal rate, the adverse events withdrawal rate, and the withdrawal rate for seizure aggravation.

Meta-analyses were performed using the software EasyMA [31,32] and their results are presented graphically, including RRs and corresponding 95% CIs, as well as RR ratio for the comparison between adult and children.

The baseline risk of the primary and secondary endpoints was compared between adult and paediatric trials using logistic regression, with a level of significance at  $p < 0.05$ .

## Results

The initial search for RCTs investigating any AED in the add-on treatment of drug-resistant partial epilepsy yielded 2,122 articles. A review of the abstracts and exclusion of irrelevant and duplicate articles yielded 109 articles (Figure 1). Of the 109 articles examined, we excluded 25 open-label trials or trials with inappropriate blinding methods, seven studies with inappropriate randomization, two studies with a response conditional design, two studies with a period of treatment phase shorter than 8 wk, one monotherapy study, ten studies with inappropriate baseline, five review articles, five studies for which we were unable to determine the 50% responder rate, and two duplicate studies, leaving 50 potentially eligible studies (Figure 1). Among these 50 studies, we excluded 18 that investigated AEDs that have not been evaluated in paediatric populations (Figure 1). Two trials were only published in abstract [33,34]. However, the main data regarding the study design and the 50% responder rate were directly available in these abstracts, and missing information could be retrieved in the corresponding systematic review performed by the Cochrane Collaboration Group [35,36]. No other unpublished RCTs fulfilling our criteria was notified by pharmaceutical companies.

Five drugs—gabapentin (GBP), levetiracetam (LEV), lamotrigine (LTG), oxcarbazepine (OXC), and topiramate (TPM)—were evaluated in 32 RCTs fulfilling our inclusion criteria, with at least one trial in children and another one in adults for each AED. Five RCTs included children; the other 27 included adults. The main characteristics and results of these trials are given in Tables 1 and 2, as well as in Figure 2, while their detailed characteristics are presented in Text S4. The mean age of patients was 10 y in paediatric trials and 33 y in adult trials. In children, it ranged from 2 to 17 y. However, information about baseline characteristics and seizure outcome in different age subgroups (i.e., < 6, 6–12, and > 12 y) was never provided. Study designs were similar between paediatric and adult trials. All paediatric trials were performed with parallel groups. In adults, there were nine crossover trials and 18 trials with parallel groups. The mean duration of the baseline was nonsignificantly shorter in children than in adults (7.6 and 9.5 wk, respectively;  $p = 0.067$ ).

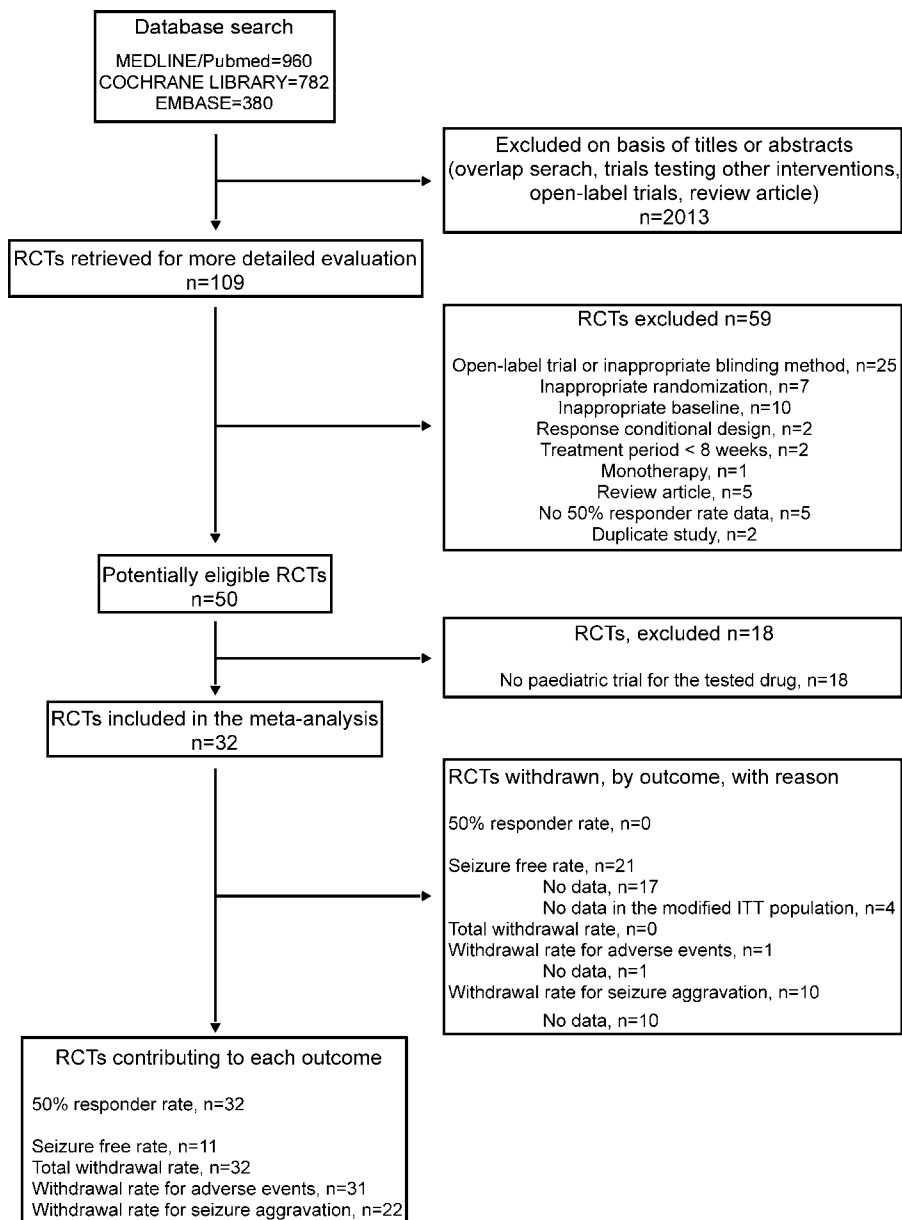

**Figure 1.** Flow Diagrams of Trials  
doi:10.1371/journal.pmed.0050166.g001

The mean duration of the treatment period was 15 wk in both paediatric and adult trials. With the exception of LTG trials, in which the paediatric dose was similar to the adult one, the mean dose studied was different in children and adults trials. It was 57% higher in the paediatric GBP trial than in adults, 100% higher in the paediatric LEV trial than in adults, and 60% higher in the paediatric OXC study than in adults. By contrast, for TPM, the mean dose studied was 50% lower in paediatric trials than in adults. We did not observe differences in the baseline patient characteristics, suggesting substantial clinical heterogeneity between adult and paediatric trials, although some data were missing in some trials (Table 1). The sex ratio, seizure types, baseline seizure frequency, and number of background AEDs were similar in both populations. An average of 85% of adult patients and 82% of children suffered from complex partial seizures,

whereas 41% of adults and 47% of children suffered from secondarily generalised partial seizures ( $p = 0.44$ ). The median seizure frequency per month was 11.8 in children and 10.1 in adults ( $p = 0.69$ ). When these figures were compared for each drug, separately, comparable median seizure frequency were found in children and adults for GBP, LTG, LEV, and OXC. By contrast, in TPM trials, children had a median seizure frequency twice that of adults (21 and 10.5 per month, respectively). The aetiology of the disease was rarely specified, and could not be compared between age groups. However, it should be stressed that 40% of the children included in the LTG paediatric trial were diagnosed as suffering from idiopathic epilepsy. This form of epilepsy was not reported in other trials, and is often considered an exclusion criterion in RCTs performed in adult patients with drug-resistant partial epilepsy.

Table 1. Characteristics of Studies Included in the Meta-Analysis

| Drug | Age Group                 | Trial                         | Design         | Doses                | Duration (Weeks)   |         | Number of Patients |     |     | Age (Years) | Sex (%) | Duration of Epilepsy (Years) | Baseline Seizure Type (%) <sup>a</sup> |     |     | Baseline Seizure Frequency (Median/Month) | Concurrent AEDs (% of Patients) |       |    |    |     |    |     |
|------|---------------------------|-------------------------------|----------------|----------------------|--------------------|---------|--------------------|-----|-----|-------------|---------|------------------------------|----------------------------------------|-----|-----|-------------------------------------------|---------------------------------|-------|----|----|-----|----|-----|
|      |                           |                               |                |                      | (mg)               | (mg/kg) | Baseline           | AED | PCB |             |         |                              | Total                                  | AED | PCB |                                           | Mean                            | Range | M  | F  | SP  | CP | SGS |
| GBP  | A                         | UK gabapentin 1990 [64]       | Parallel       | 1200                 | 17                 | 12      | 14                 | 127 | 61  | 66          | 31      | 14–73                        | 39                                     | 61  | 18  | 15                                        | 69                              | 60    | 0  | 13 | 33  | 64 | 3   |
|      | A                         | Sivenius et al. 1991 [65]     | Parallel       | 900;1200             | 13;17              | 12      | 12                 | 45  | 27  | 18          | 39      | 16–59                        | 47                                     | 53  | 23  | 7                                         | 91                              | 49    | 0  | 8  | 49  | 51 | 0   |
|      | A                         | US gabapentin 1993 [66]       | Parallel       | 600;1200;1800        | 9;17;26            | 12      | 12                 | 306 | 208 | 98          | 35      | 16–70                        | 66                                     | 34  | 21  | 50                                        | 93                              | 63    | 1  | 11 | 37  | 62 | 1   |
|      | A                         | Anhut et al. 1994 [56]        | Parallel       | 900;1200             | 13;17              | 12      | 12                 | 272 | 163 | 109         | 32      | 12–67                        | 56                                     | 44  | —   | 39                                        | 90                              | 55    | 18 | 10 | 24  | 68 | 8   |
| A    | Yamauchi et al. 2006 [58] | Parallel                      | 1200;1800      | 17;26                | 12                 | 12      | 209                | 127 | 82  | 32          | 16–65   | 48                           | 52                                     | 20  | 51  | 78                                        | 28                              | 0     | 11 | 14 | 86  | 0  |     |
| P    | Appleton et al. 1999 [54] | Parallel                      | NA             | 23–35                | 6                  | 12      | 247                | 119 | 128 | 9           | 3–12    | 54                           | 46                                     | 6   | 45  | 85                                        | 58                              | 15    | 11 | 30 | 47  | 23 |     |
| LTG  | A                         | Binnie et al. 1989 [67]       | CO             | 200                  | 3 <sup>b</sup>     | 8       | 12                 | 34  | 16  | 18          | 37      | 16–51                        | 65                                     | 35  | 23  | —                                         | —                               | —     | —  | —  | 7   | 43 | 50  |
|      | A                         | Jawad et al. 1989 [68]        | CO             | 250                  | 4                  | 8       | 12                 | 24  | 12  | 12          | —       | 16–60                        | —                                      | —   | —   | 4                                         | 100                             | 62    | 0  | —  | 17  | 83 | 0   |
|      | A                         | Loiseau et al. 1990 [69]      | CO             | 300                  | 5 <sup>b</sup>     | 4       | 8                  | 25  | 11  | 14          | 34      | 20–54                        | 48                                     | 52  | 17  | 26                                        | 91                              | 17    | <1 | —  | 35  | 65 | 0   |
|      | A                         | Matsuoka et al. 1993 [70]     | Parallel       | 300;500              | 4;7                | 12      | 24                 | 216 | 143 | 73          | 33      | 18–63                        | 31                                     | 69  | 22  | —                                         | —                               | 32    | 0  | 12 | 40  | 53 | 7   |
|      | A                         | Schapel et al. 1993 [71]      | CO             | 300                  | 4                  | 12      | 12                 | 41  | 21  | 20          | 31      | 17–63                        | 51                                     | 49  | —   | —                                         | —                               | —     | —  | —  | 15  | 83 | 2   |
|      | A                         | Schmidt et al. 1993 [34]      | CO             | 300                  | 4                  | 12      | 12                 | 23  | 11  | 12          | —       | 16–62                        | 48                                     | 52  | —   | —                                         | —                               | —     | —  | —  | —   | —  | —   |
|      | A                         | Smith et al. 1993 [72]        | CO             | 300                  | 4                  | 4       | 18                 | 81  | 41  | 40          | 34      | 15–67                        | 41                                     | 59  | 21  | 19                                        | 89                              | 44    | 0  | —  | —   | —  | —   |
|      | A                         | Messenheimer et al. 1994 [73] | CO             | 400                  | 6                  | 8       | 14                 | 98  | 46  | 52          | 35      | 18–64                        | 47                                     | 53  | 23  | —                                         | —                               | —     | 13 | —  | 41  | 57 | 2   |
|      | A                         | Boas et al. 1996 [74]         | CO             | 200                  | 3                  | 12      | 12                 | 56  | 30  | 26          | 40      | 18–67                        | 48                                     | 52  | —   | 34                                        | 82                              | 27    | 14 | —  | 27  | 71 | 2   |
|      | P                         | Duchowny et al. 1999 [37]     | Parallel       | NA                   | 3–15               | 8       | 18                 | 199 | 98  | 101         | —       | 2–16                         | 52                                     | 48  | —   | —                                         | —                               | 50    | —  | 9  | 50  | 50 | 0   |
| LEV  | A                         | Ben-Menachem et al. 2000 [75] | Parallel       | 3000                 | 43                 | 12      | 16                 | 286 | 181 | 105         | 36      | 17–70                        | 48                                     | 52  | 19  | 23                                        | 97                              | 27    | 0  | 7  | —   | —  | —   |
|      | A                         | Cereghino et al. 2000 [76]    | Parallel       | 1000;3000            | 13;38 <sup>b</sup> | 12      | 18                 | 294 | 199 | 95          | 38      | 16–70                        | 61                                     | 39  | —   | —                                         | —                               | —     | —  | 9  | 33  | 62 | 5   |
|      | A                         | Shorvon et al. 2000 [77]      | CO             | 1000;2000            | 14;29              | 8–12    | 16                 | 324 | 212 | 112         | 37      | 14–69                        | 48                                     | 52  | 24  | 31                                        | 83                              | 26    | 7  | 10 | —   | —  | —   |
|      | A                         | Tsai et al. 2006 [78]         | Parallel       | 2000                 | 32 <sup>b</sup>    | 8       | 14                 | 94  | 47  | 47          | 32      | 16–60                        | 45                                     | 55  | 19  | —                                         | —                               | —     | —  | 7  | 19  | 39 | 42  |
| P    | Glauser et al. 2006 [79]  | Parallel                      | NA             | 60                   | 8                  | 14      | 198                | 101 | 97  | 10          | 4–17    | 51                           | 49                                     | 7   | —   | —                                         | —                               | —     | 5  | 34 | 58  | 8  |     |
| A    | Barcs et al. 2000 [80]    | Parallel                      | 600; 1200;2400 | 8;17;34 <sup>b</sup> | 8                  | 28      | 694                | 521 | 173 | 34          | 15–66   | 49                           | 51                                     | —   | —   | —                                         | 33                              | —     | 10 | 26 | 48  | 26 |     |
| TPM  | P                         | Glauser et al. 2000 [81]      | Parallel       | NA                   | 30–36              | 8       | 16                 | 267 | 138 | 129         | 11      | 3–17                         | 53                                     | 47  | —   | —                                         | —                               | 40    | —  | 13 | —   | —  | —   |
|      | A                         | Ben-Menachem et al. 1996 [82] | Parallel       | 800                  | 11 <sup>b</sup>    | 8       | 13                 | 56  | 28  | 28          | 37      | 18–65                        | 84                                     | 16  | —   | —                                         | —                               | 11    | —  | 13 | 38  | 62 | 0   |
| A    | A                         | Faught et al. 1996 [83]       | Parallel       | 200;400;600          | 3;6;9              | 12      | 16                 | 181 | 136 | 45          | 37      | 19–68                        | 79                                     | 21  | —   | 26                                        | 51                              | 35    | 0  | 11 | 36  | 64 | 0   |
|      | A                         | Privitera et al. 1996 [84]    | Parallel       | 600;800;1000         | 9;12;15            | 12      | 18                 | 190 | 143 | 47          | 35      | 18–65                        | 80                                     | 20  | —   | 47                                        | 93                              | 63    | <1 | 11 | 45  | 55 | 0   |
|      | A                         | Rosenfeld et al. 1996 [33]    | Parallel       | 1000                 | 15                 | 8       | 19                 | 209 | 167 | 42          | —       | 18–60                        | 49                                     | 51  | —   | —                                         | —                               | —     | —  | —  | 100 | 0  | 0   |
|      | A                         | Sharief et al. 1996 [85]      | Parallel       | 400                  | 5 <sup>b</sup>     | 8       | 11                 | 47  | 23  | 24          | 34      | 18–65                        | 85                                     | 15  | —   | 34                                        | 91                              | 74    | 17 | 12 | —   | —  | —   |
|      | A                         | Tassinari et al. 1996 [57]    | Parallel       | 600                  | 9 <sup>b</sup>     | 8       | 12                 | 60  | 30  | 30          | 33      | 18–65                        | 78                                     | 22  | —   | —                                         | —                               | —     | —  | 15 | —   | —  | —   |
|      | A                         | Korean study group 1999 [86]  | Parallel       | 600                  | 9 <sup>b</sup>     | 12      | 18                 | 177 | 91  | 86          | 30      | 16–65                        | 54                                     | 46  | 16  | 9                                         | 80                              | 39    | 0  | 6  | 21  | 79 | 0   |
|      | A                         | Yen et al. 2000 [87]          | Parallel       | 300                  | 5 <sup>b</sup>     | 8       | 14                 | 46  | 23  | 23          | 31      | 18–54                        | 41                                     | 59  | 16  | —                                         | —                               | —     | —  | 3  | 11  | 28 | 61  |
| P    | Elterman et al. 1999 [55] | Parallel                      | NA             | 6                    | 8                  | 16      | 86                 | 41  | 45  | 9           | 2–16    | 56                           | 44                                     | —   | 27  | 79                                        | 40                              | 7     | 21 | 45 | 53  | 2  |     |

<sup>a</sup>Patients could have had more than one seizure type; SP, simple partial; CP, complex partial; GS, secondarily generalised partial seizure

<sup>b</sup>Studies in which the mean body weight was not provided. The dose (mg/kg) was calculated using the average of the mean body weights collected in the other trials (70 kg).

A, adult; CO, crossover; F, female; M, male; NA, not available; P, paediatric; PCB, placebo.

doi:10.1371/journal.pmed.0050166.t001

**Table 2.** Percentages of 50% Responders, Seizure-Free Patients, and Withdrawals

| Drug | Age Group                     | Trial                         | Number of Patients |     | 50% Responders (% of ITT) |      | Seizure Free (% of ITT) |      | Withdrawal (% of ITT Patients) |      | Lost to Follow-Up |      | Seizure Aggravation |     | Other |     |      |
|------|-------------------------------|-------------------------------|--------------------|-----|---------------------------|------|-------------------------|------|--------------------------------|------|-------------------|------|---------------------|-----|-------|-----|------|
|      |                               |                               | Total              | AED | PCB                       | AED  | PCB                     | AED  | PCB                            | AED  | PCB               | AED  | PCB                 | AED | PCB   | AED | PCB  |
|      |                               |                               |                    |     |                           |      |                         |      |                                |      |                   |      |                     |     |       |     |      |
| GBP  | A                             | UK gabapentin 1990 [64]       | 127                | 61  | 66                        | 21.3 | 9.1                     | —    | 11.5                           | 6.1  | 9.8               | 6.1  | 0                   | 0   | 0     | 0   | 0    |
|      | A                             | Sivenius et al. 1991 [65]     | 45                 | 27  | 18                        | 18.5 | 16.7                    | —    | 0                              | 0    | 0                 | 0    | 0                   | 0   | 0     | 0   | 0    |
|      | A                             | US gabapentin 1993 [66]       | 306                | 208 | 98                        | 18.8 | 8.2                     | —    | 5.8                            | 2    | 3.4               | 1    | —                   | —   | —     | —   | —    |
|      | A                             | Anhut et al. 1994 [56]        | 272                | 163 | 109                       | 22.1 | 10.1                    | —    | 7.4                            | 8.3  | 6.7               | 3.7  | 0                   | 0   | 0.6   | 1.8 | 0    |
|      | A                             | Yamauchi et al. 2006 [58]     | 209                | 127 | 82                        | 15.7 | 6.1                     | 0    | 7.1                            | 7.3  | 5.5               | 1.2  | 0                   | 0   | 0     | 3.7 | 1.6  |
|      | P                             | Appleton et al. 1999 [54]     | 247                | 119 | 128                       | 21   | 18                      | 2.5  | 0.78                           | 17.6 | 21.9              | 5    | 2.3                 | 0   | 0     | 9.2 | 14.8 |
|      | A                             | Binnie et al. 1989 [67]       | 34                 | 16  | 18                        | 6.3  | 5.6                     | —    | —                              | 0    | 0                 | 0    | 0                   | 0   | 0     | 0   | 0    |
|      | A                             | Jawad et al. 1989 [68]        | 24                 | 12  | 12                        | 50   | 8.3                     | —    | 8.3                            | 0    | 8.3               | 0    | 0                   | 0   | 0     | 0   | 0    |
|      | A                             | Loiseau et al. 1990 [69]      | 25                 | 11  | 14                        | 18.2 | 7.1                     | —    | 9.1                            | 7.1  | 0                 | 0    | 7.1                 | 0   | 0     | 0   | 9.1  |
|      | A                             | Matsuo et al. 1993 [70]       | 216                | 143 | 73                        | 23.1 | 13.7                    | 0.7  | 13.3                           | 8.2  | 9.1               | 1.4  | —                   | —   | —     | —   | —    |
| A    | Schapel et al. 1993 [71]      | 41                            | 20                 | 21  | 25                        | 4.8  | —                       | 0    | 0                              | 0    | 0                 | 0    | 0                   | 0   | 0     | 0   |      |
| A    | Schmidt et al. 1993 [34]      | 23                            | 11                 | 12  | 9.1                       | 8.3  | —                       | 9.1  | 0                              | 0    | 0                 | 9.1  | 0                   | 0   | 0     | 0   |      |
| A    | Smith et al. 1993 [72]        | 81                            | 41                 | 40  | 9.8                       | 2.5  | —                       | 14.6 | 7.5                            | 14.6 | 2.5               | 0    | 2.5                 | 0   | 2.5   | 0   |      |
| A    | Messenheimer et al. 1994 [73] | 98                            | 46                 | 52  | 21.7                      | 7.7  | —                       | 4.3  | 7.7                            | 0    | 1.9               | 0    | 2.2                 | 1.9 | 0     | 2.2 |      |
| A    | Boas et al. 1996 [74]         | 56                            | 30                 | 26  | 20                        | 15.4 | —                       | 26.7 | 7.7                            | 13.3 | 0                 | 10   | 0                   | 0   | 3.3   | 3.8 |      |
| P    | Duchowny et al. 1999 [37]     | 199                           | 98                 | 101 | 41.8                      | 15.8 | —                       | 14.3 | 17.8                           | 5.1  | 5.9               | 1    | 2                   | 0   | 6.1   | 7.9 |      |
| LEV  | A                             | Ben Menachem et al. 2000 [75] | 286                | 181 | 105                       | 39.2 | 14.3                    | 6.1  | 0.95                           | 17.7 | 14.3              | 9.4  | 8.6                 | 3.3 | 1     | 1.7 | 1    |
| A    | Cereghino et al. 2000 [76]    | 294                           | 199                | 95  | 38.2                      | 7.4  | 3.5                     | 0    | 10.1                           | 6.3  | 6.5               | 5.3  | 1.5                 | 1.1 | 1.5   | 0   |      |
| A    | Shorvon et al. 2000 [77]      | 324                           | 212                | 112 | 27.8                      | 6.3  | —                       | 14.6 | 13.4                           | 10.8 | 5.4               | 2.4  | 4.5                 | 0   | 0     | 0   |      |
| A    | Tsai et al. 2006 [78]         | 94                            | 47                 | 47  | 42.6                      | 10.6 | —                       | 6.4  | 2.1                            | 6.4  | 2.1               | 0    | 0                   | 0   | 0     | 0   |      |
| P    | Glauser et al. 2006 [79]      | 198                           | 101                | 97  | 44.6                      | 19.6 | 6.9                     | 1.03 | 6.9                            | 14.4 | 5                 | 9.3  | 0                   | 0   | 2.1   | 1   |      |
| OXC  | A                             | Barcs et al. 2000 [80]        | 694                | 521 | 173                       | 39.3 | 12.7                    | 1.3  | 0.58                           | 47.6 | 28.3              | 38.4 | 8.7                 | —   | —     | —   |      |
| P    | Glauser et al. 2000 [81]      | 267                           | 138                | 129 | 39.9                      | 21.7 | 3.6                     | 0.78 | 15.2                           | 7.8  | 10.1              | 3.1  | 1.4                 | 0.8 | 0     | 3.1 |      |
| TPM  | A                             | Ben-Menachem et al. 1996 [82] | 56                 | 28  | 28                        | 42.9 | 0                       | —    | 21.4                           | 3.6  | 21.4              | 0    | —                   | —   | —     | —   |      |
| A    | Faught et al. 1996 [83]       | 181                           | 136                | 45  | 39.7                      | 17.8 | —                       | 11.8 | 11.1                           | 8.8  | 6.7               | —    | —                   | —   | —     | —   |      |
| A    | Privitera et al. 1996 [84]    | 190                           | 143                | 47  | 40.6                      | 8.5  | —                       | 23.1 | 6.4                            | 16.1 | 2.1               | —    | —                   | —   | —     | —   |      |
| A    | Rosenfeld et al. 1996 [33]    | 209                           | 167                | 42  | 51.5                      | 19   | —                       | 19.8 | 7.1                            | —    | —                 | —    | —                   | —   | —     | —   |      |
| A    | Sharief et al. 1996 [85]      | 47                            | 23                 | 24  | 34.8                      | 8.3  | —                       | 26.1 | 8.3                            | 26.1 | 4.2               | —    | —                   | —   | —     | —   |      |
| A    | Tassinari et al. 1996 [57]    | 60                            | 30                 | 30  | 46.7                      | 10   | 0                       | 16.7 | 6.7                            | 13.3 | 3.3               | —    | —                   | —   | —     | —   |      |
| A    | Korean study group 1999 [86]  | 177                           | 91                 | 86  | 49.5                      | 12.8 | 7.7                     | 1.16 | 16.5                           | 10.5 | 7.7               | 3.5  | —                   | —   | —     | —   |      |
| A    | Yen et al. 2000 [87]          | 46                            | 23                 | 23  | 47.8                      | 13   | —                       | 13   | 8.7                            | 8.7  | 8.7               | 0    | 0                   | 0   | 0     | 4.3 |      |
| P    | Elterman et al. 1999 [55]     | 86                            | 41                 | 45  | 39                        | 20   | 4.9                     | 0    | 4.4                            | 0    | 2.2               | 0    | 2.2                 | 0   | 0     | 0   |      |

PCB, placebo. doi:10.1371/journal.pmed.0050166.t002

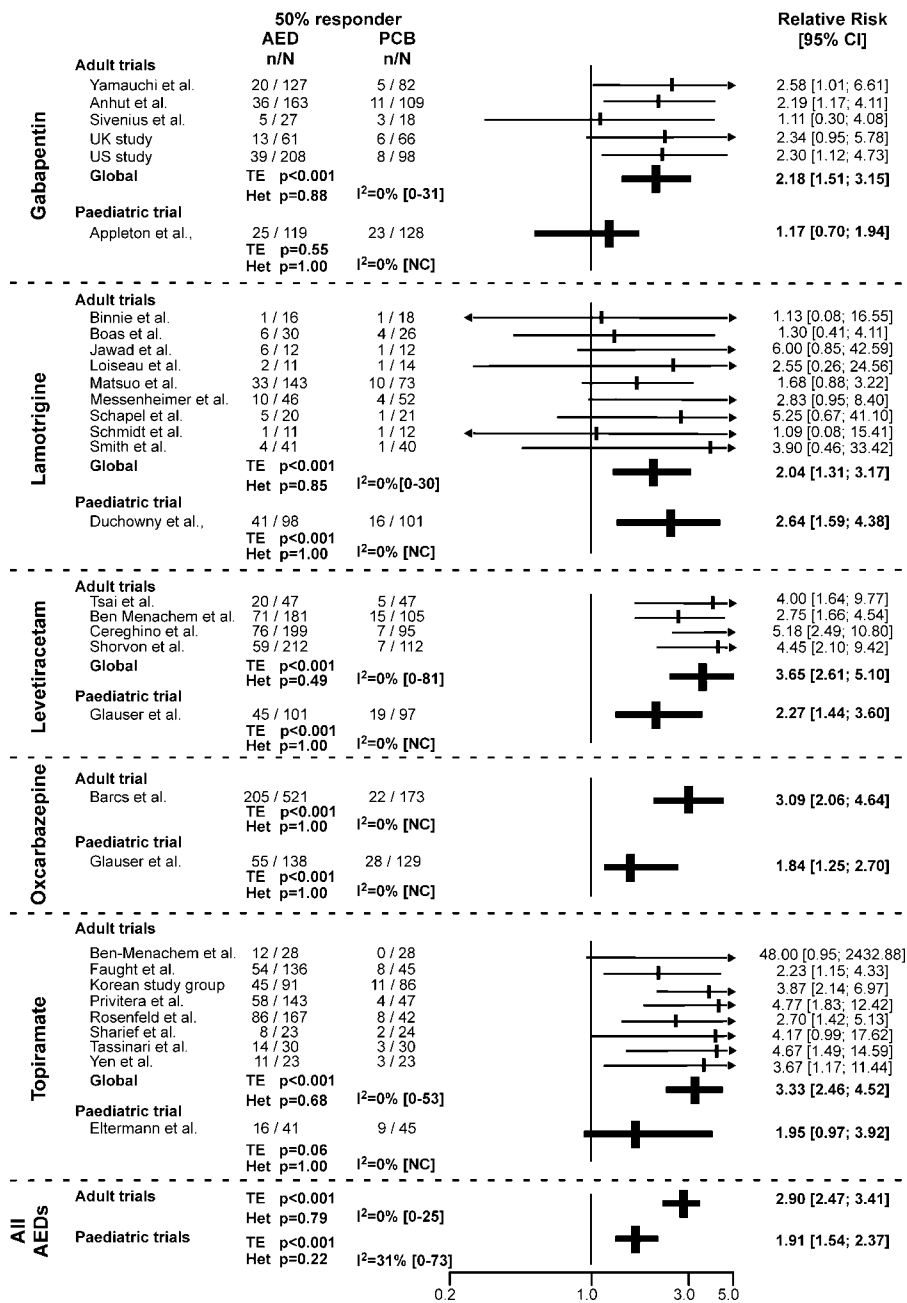

**Figure 2.** Proportion of 50% Responders in Each Trial

$I^2$ , point estimates of Higgins  $I^2$  with confidence interval; p Het, value of the heterogeneity test; p TE, value of the treatment effect test. doi:10.1371/journal.pmed.0050166.g002

### Primary Endpoint: Comparison of the 50% Responder Rate

Indirect comparison of the RR of the 50% responder rate in adults and children showed lower values in children (1.91 [95% CI 1.54–2.37]) than in adults (2.90 [2.47–3.41]), with confidence intervals that did not overlap (Figures 2 and 3A). When we tested this issue further in a meta-analysis that calculated the RR ratio of the 50% responder rate between adults and children for each of the five drugs, we confirmed a significant difference (0.67 [95% CI 0.51–0.89],  $p = 0.007$ ) pointing to lower values in children (Figure 3A). No significant heterogeneity was observed between drugs in this analysis (Figures 2 and 3A). These findings were further confirmed by the meta-regression, demonstrating a signifi-

cant relation between the age of patients and the treatment effect ( $p = 0.02$ ).

The above findings were found to primarily reflect differences in the response of the two populations to placebo. Indeed, logistic regression showed that the mean 50% responder rate in patients receiving placebo was significantly higher in children (19%  $\pm$  2.3%) than in adults (9.9%  $\pm$  4.6%) ( $p < 0.001$ ), whereas no significant difference was observed in the response to AEDs between these two populations (37.2%  $\pm$  9.4% in children versus 30.4%  $\pm$  13.9% in adults,  $p = 0.364$ ) (Figure 3B). The 1.9 times greater 50% responder rate observed in children receiving placebo as compared to adult was a consistent finding across all AEDs,

## A. 50% Responder rate

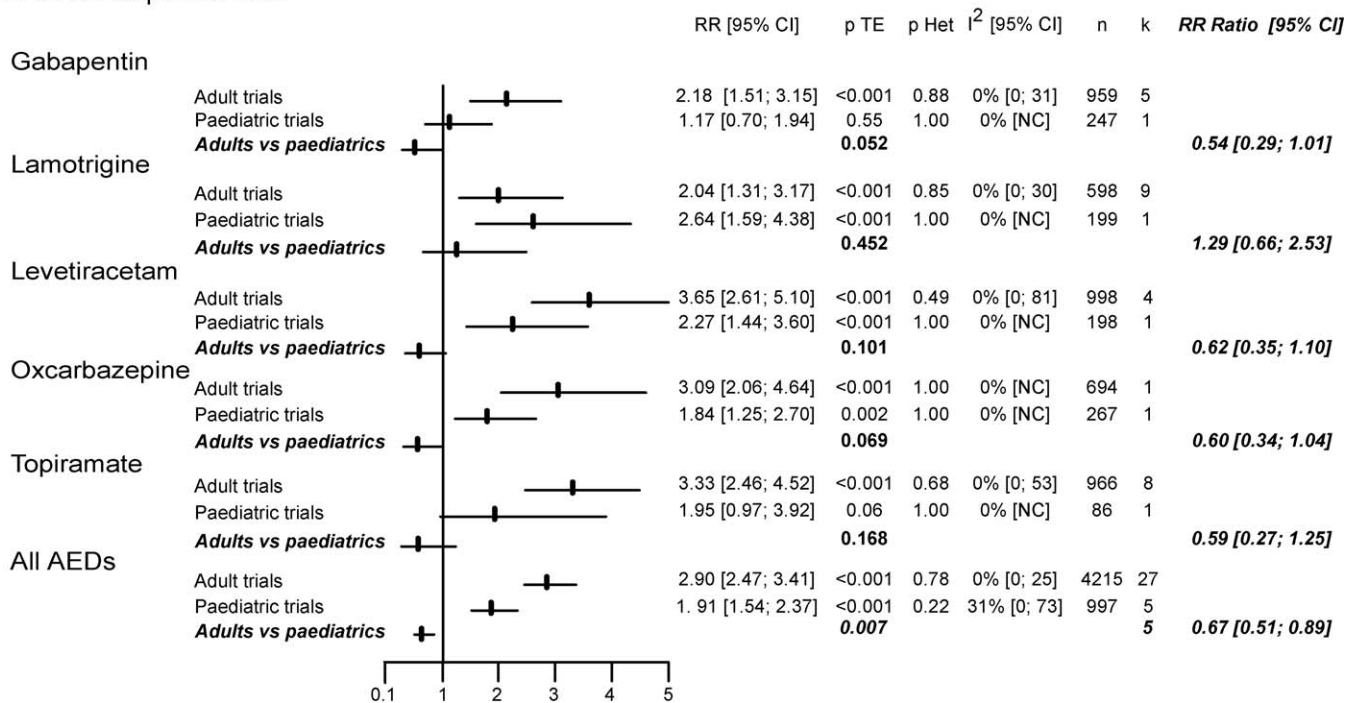

## B.

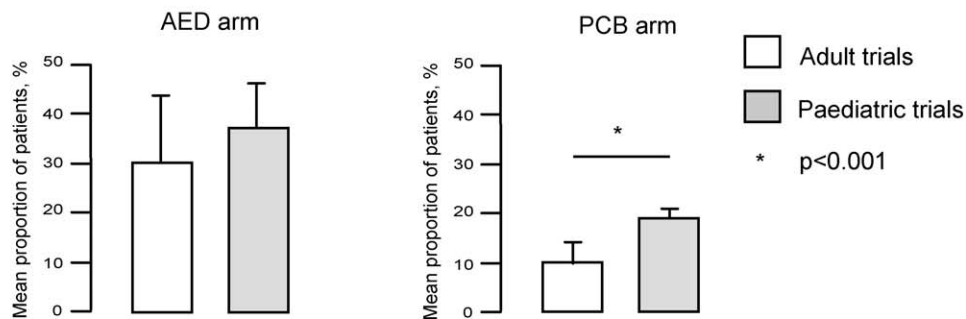

**Figure 3.** Analysis of the 50% Responder Rate Including All Dosages

(A) RR of 50% responder rate in adult and paediatric trials and comparison of RR of 50% responder rate in children and adults.

(B) Mean 50% responder rate with placebo and with AED in adult and paediatric trials. \*  $p < 0.001$  (logistic regression).

I<sup>2</sup>, point estimates of Higgins I<sup>2</sup> with confidence interval; k, total number of trials; n, total number of patients; p Het, value of the heterogeneity test; p TE, value of the treatment effect test.

doi:10.1371/journal.pmed.0050166.g003

including LTG (1.7 for OXC and GBP, 1.8 for TPM, 1.9 for LEV, and 2.0 for LTG).

All above results remained valid when the same analyses were restricted to comparable doses between paediatric and adult trials (Figure S1). The RR ratio of the 50% responder rate between adults and children was 0.63 (95% CI 0.47–0.84) ( $p = 0.002$ ). These findings were confirmed by the meta-regression, demonstrating a significant relation between the age of patients and the treatment effect ( $p = 0.02$ ). Similarly, the 50% responder rate in patients receiving placebo remained significantly higher in children (19%  $\pm$  2.3%) than in adults (10.1%  $\pm$  4.1%) ( $p < 0.001$ , Figure S1B).

### Secondary Endpoints

**Seizure-free rate (Figure 4).** The seizure-free rate was provided in only 15 of the 32 trials, including 11 of the 27

adults trials and four of the five paediatric trials (Table 2). Furthermore, the published data did not allow to calculate the number of seizure-free patients in the modified ITT population (see methods) in seven trials. However, these data could be retrieved for three of these seven trials from a recently published meta-analysis that focused on seizure-free outcome [29]. Overall, the seizure-free rate in the modified ITT population was available for four AEDs (GBP, LEV, OXC, and TPM) in seven adult and four children trials (Table 2).

The RR of seizure-free rate was 4.19 (95% CI 1.45–12.14) in adult trials and 5.00 (1.52–16.42) in paediatric trials. There was no significant difference between adult and paediatric studies (RR ratio 1.42 [95% CI 0.23–8.77],  $p = 0.704$ ;  $p = 0.68$  by meta-regression). In addition, the seizure-free rate in treatment and placebo arms were similar in both populations, with 2.8% of adults and 4.5% of children receiving AEDs ( $p =$



## A. Seizure-free rate

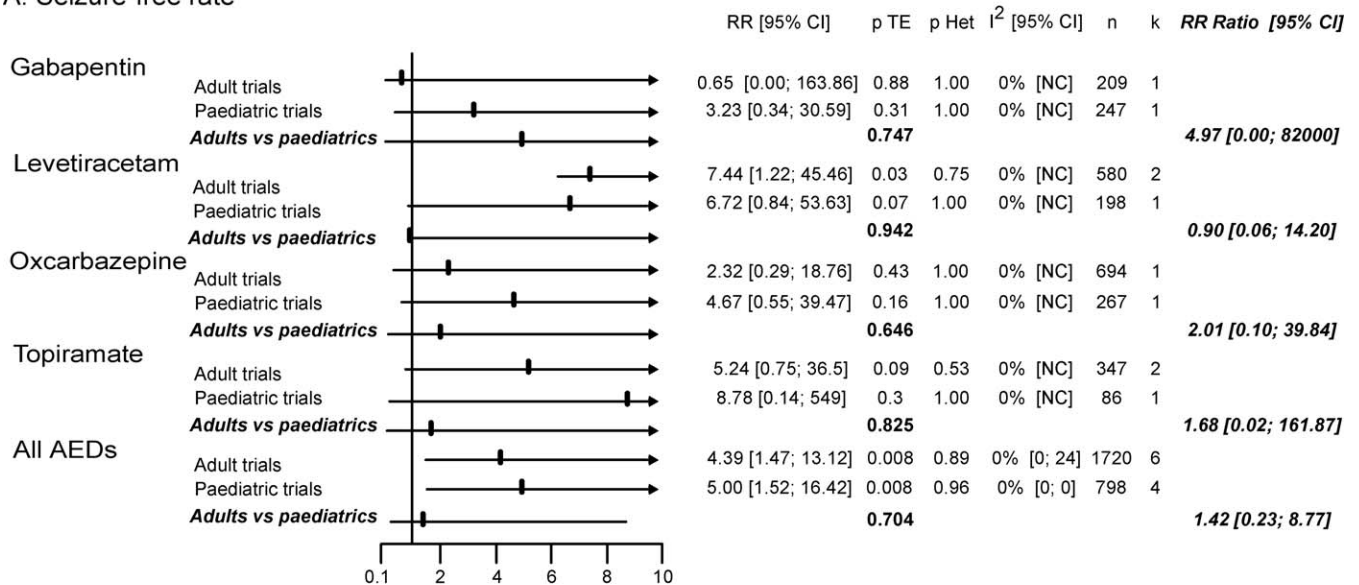

## B.

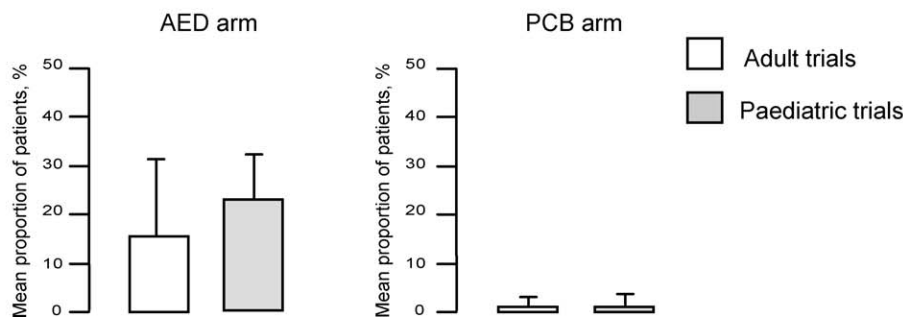

**Figure 4.** Analysis of the Seizure-Free Rate

(A) RR of seizure-free rate in adult and paediatric trials and comparison of RR of seizure-free rate in children and adults.

(B) Mean seizure-free rate with placebo and with AED in adult and paediatric trials.

I<sup>2</sup>, point estimates of Higgins I<sup>2</sup> with confidence interval; k, total number of trials; n, total number of patients; p Het, value of the heterogeneity test; p TE, value of the treatment effect test.

doi:10.1371/journal.pmed.0050166.g004

0.256), and 0.4% of adults and 0.6% of children receiving placebo ( $p = 0.607$ ) achieving seizure freedom during the entire treatment period.

**Withdrawal rates (Figure 5).** In adults, both the total and adverse events withdrawal rates were significantly more frequent in treatment than in placebo arms. Indeed, the RR of the withdrawal rates for any reason and for adverse events were respectively 1.57 (95% CI 1.33–1.86) and 2.49 (1.90–3.28) (Figures 5A and 5B). By contrast, in children, neither the total nor the adverse events withdrawal rates differed between treatment and placebo arms (RR 0.89 [95% CI 0.64–1.22] for total withdrawal rate and of 1.24 [0.70–2.20] for adverse events withdrawal rate). When comparing the RRs of the total withdrawal rate between the two populations, there was no overlap between the confidence intervals observed in children (0.64–1.22) and adults (1.33–1.86). Accordingly, meta-analysis of the RR ratio demonstrated significant differences between the two populations for the total withdrawal rate, with a ratio of 0.65 (95% CI 0.43–0.98,  $p = 0.037$ ) pointing to lower RR values in paediatric trials (Figure

5A), a finding confirmed by the meta-regression ( $p = 0.004$ ). When analysing the above differences, we found a non-significant higher total withdrawal rate in children receiving placebo (13.3%) than in adults (7%) ( $p = 0.08$ , Figure 5D), whereas no difference was observed between the two populations in the active treatment arm (13.4% in adults and 11.8% in children,  $p = 0.775$ ).

The meta-analysis of the RR ratio for the adverse events withdrawal rate also demonstrated significantly lower values in children than in adult RCTs, with a ratio of 0.51 (95% CI 0.26–0.98,  $p = 0.045$ ). However, this finding was not confirmed by the meta-regression ( $p = 0.08$ ).

There was no difference in the RR of withdrawal rate for seizure aggravation between adults (0.74 [95% CI 0.28–1.98],  $p = 0.55$ ) and children (1.24 [0.70–2.20],  $p = 0.13$ ), as further demonstrated by the RR ratio (1.24 [0.33–4.62],  $p = 0.754$ , Figure 5C) and the meta-regression ( $p = 0.605$ ). However, logistic regression showed that children receiving placebo dropped out for an aggravation of seizures (5.6%) more frequently than adults (0.7%) ( $p < 0.001$ , Figure 5D).

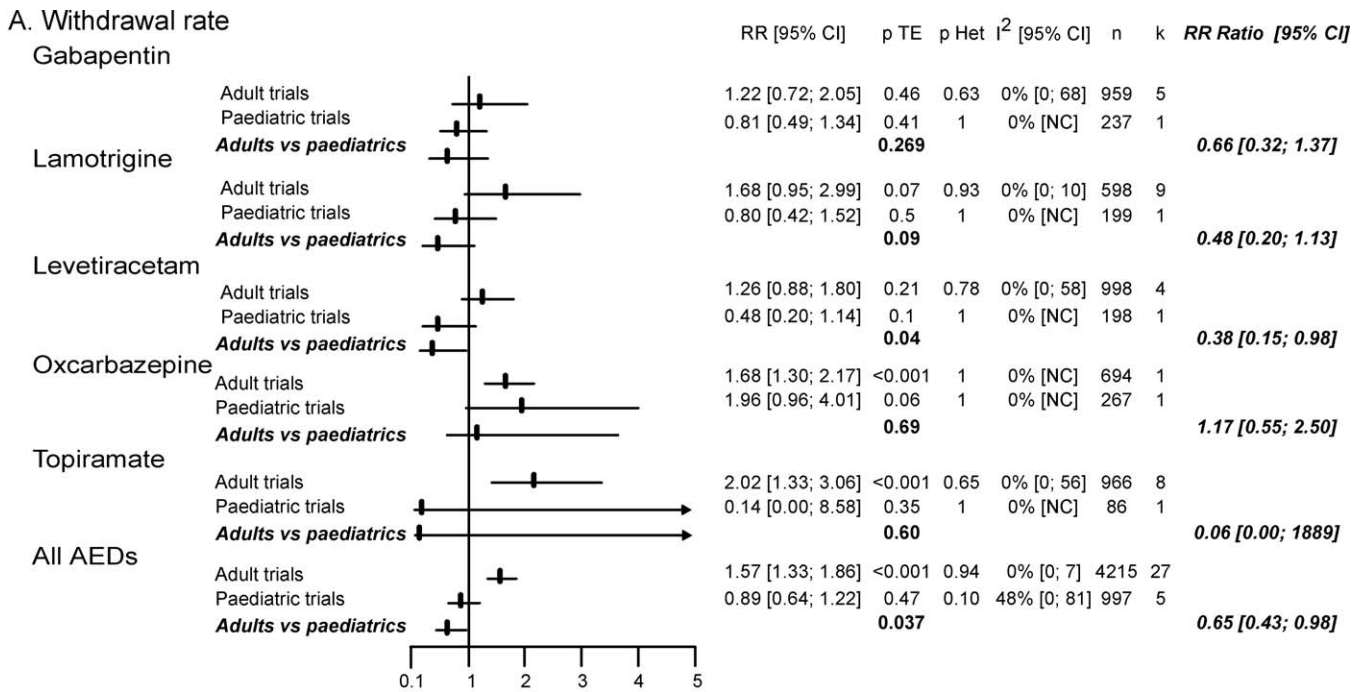

**B. Withdrawal rate for adverse events**

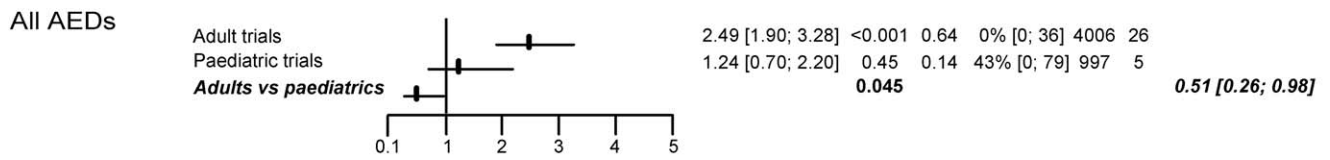

**C. Withdrawal rate for seizure aggravation**

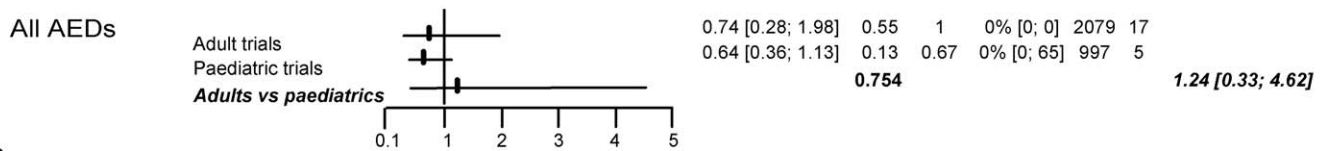

**D. Withdrawal rate, Withdrawal rate for adverse events, Withdrawal rate for seizure aggravation**

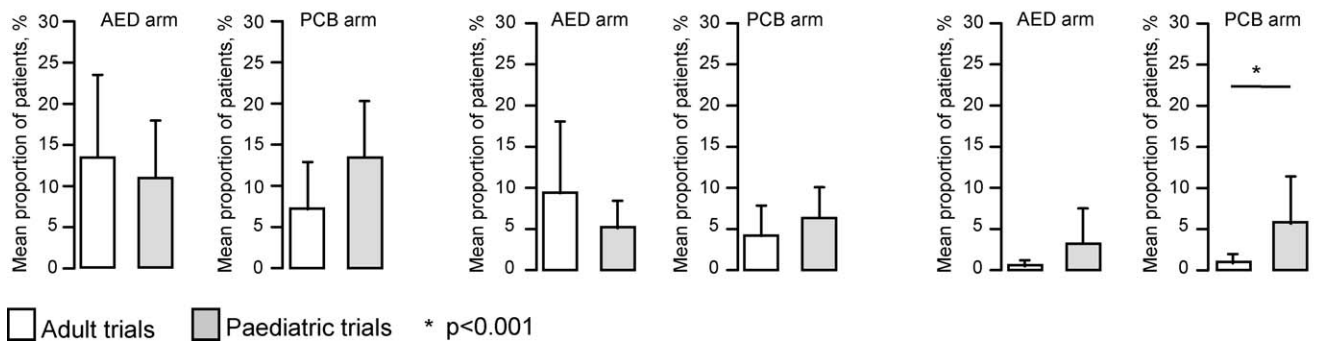

**Figure 5.** Analysis of the Withdrawal Rates

(A) RR of withdrawal for any reason in adult and paediatric trials and comparison of RR of the total withdrawal rate in children and adults.

(B) Comparison of RR of the adverse events withdrawal rate in children and adults.

(C) Comparison of RR of the withdrawal rate related to seizure aggravation in children and adults.

(D) Mean withdrawal rate for either any reasons, adverse events or seizure aggravation with placebo and with AED in adult and paediatric trials. \*  $p < 0.001$  (logistic regression).

I<sup>2</sup>, point estimates of Higgins I<sup>2</sup> with confidence interval; k, total number of trials; n, total number of patients; p Het, value of the heterogeneity test; p TE, value of the treatment effect test.

doi:10.1371/journal.pmed.0050166.g005

There was no difference between paediatric and adult trials in loss to follow-up and consent withdrawal (Table 2).

## Discussion

In this meta-analysis, we found that the RR of the 50% responder rate for active AEDs over placebo, one of the main measurements of AED efficacy in drug-resistant partial epilepsy, was significantly lower in paediatric trials than in adult ones. This difference was primarily related to a 2-fold higher placebo responder rate in children than in adults. Such a difference, if ignored, could well result in an underestimation of the placebo response and type II errors in paediatric RCTs.

## Study Limitations

Only five RCTs fulfilling our selection criteria were performed in children, representing one trial per AED. Thus, each paediatric trial might have had an important weight in the meta-analysis. However, the very consistent findings observed among four of the five selected AEDs strongly suggest that our main result did not depend on any single paediatric trial, but rather on the consistency of the majority of RCTs in children.

Our study focused on refractory partial epilepsy, for which AEDs are usually tested during Phases II and III before further evaluation is considered in newly diagnosed epilepsy and refractory generalised epileptic syndromes. Diagnosis of partial seizures was always based on the association of ictal signs and symptoms suggesting an underlying focal neuronal discharge and consistent neurophysiological findings on a recent electroencephalogram. According to these inclusion criteria, it is very unlikely that the patients included in the selected RCTs could have been misdiagnosed.

However, differences in the type of partial epilepsy might account for the opposite trend observed for LTG as compared to the four other AEDs, with higher RR of 50% responder rate in children than in adults. Idiopathic partial epilepsies, which are typically benign conditions, are excluded in Phase III RCTs performed in adult patients with drug-resistant partial epilepsy, and are also unlikely to meet the inclusion criteria of RCTs performed in children with refractory partial seizures. Accordingly, there was no indication that patients with idiopathic epilepsy were included in the RCTs selected for this meta-analysis, with the exception of the LTG paediatric trial in which 40% of patients were classified as having idiopathic epilepsy [37]. This rate could partly account for the 2-fold higher responder rate observed in children receiving LTG compared to adults (42% versus 20%), a difference not observed for the four other AEDs (GBP, 21% versus 19%; OXC, 40% versus 39%; TPM, 39% versus 44%; LEV, 45% versus 37%).

More generally, we cannot exclude the possibility that clinical heterogeneity between adults and children as well as between trials in the same age group might have interfered with our results. It has recently been suggested that the statistical tests available for evaluating heterogeneity between studies (i.e., Cochran  $Q$  and Higgins  $I^2$ ) may suffer some limitations [38,39]. Although the  $I^2$  did not demonstrate significant heterogeneity in our meta-analysis, its upper 95% CI ranged between 50% and 75% in some analyses, and more rarely exceeded the 75% threshold. Comparable confidence

intervals of  $I^2$  have been reported in 83% of the Cochrane meta-analyses [39], but no recommendation on the management of this limitation has yet been published.

The reluctance to recruit children with epilepsy into AEDs trials [8] might have resulted in the selection of more severe epilepsy in paediatric than in adult RCTs. In fact, the baseline median monthly seizure frequency was comparable in trials with children and adults for the entire study as well as for four of the five tested AEDs (GBP, LTG, LEV, and OXC). Furthermore, the important issue of poor seizure count reliability [40,41], which might differ between children and adults, is also unlikely to explain a difference in the 50% responder rate selectively to placebo.

Drug dosages differed between adult and paediatric trials, partly reflecting the fact that the clearance of modern AEDs is 20%–170% higher in children than in adults [7]. However, our main findings remain unchanged when we reprocessed all our analyses among a selection of RCTs and study arms that resulted in comparable doses in the two age groups.

We used an ITT assessment that may be overly conservative. However, it must be stressed that the same method was used in all the Cochrane systematic reviews of AEDs [35,36,42–48], as well as in previously published meta-analyses [49–51]. The major reason for preferring ITT rather than per-protocol analysis is that the criteria used for defining the latter greatly vary between trials and AEDs.

Finally, whether the age-dependent variation of the response to placebo observed in this study might apply to generalized epilepsies remains to be determined.

## Higher Response to Placebo in Children Than in Adults

The overall difference in the RR of being a 50% responder between adult and paediatric trials was primarily related to an age-dependent variation in the response to placebo. Indeed, placebo 50% responder rate was 1.9 times higher in children than in adults, in a very consistent way across all AEDs, including LTG. It has been suggested that the response to placebo may depend on the age of patients [9–12]. It should be remembered, however, that the RCTs considered in our meta-analysis did not include a patient group receiving no intervention. Thus, we did not measure the placebo effect per se but all nonpharmacological effects that include the placebo effect, but also the Hawthorne effect, the regression to the mean, and the clinical course of epilepsy.

The reasons underlying the higher response to placebo in paediatric populations remains largely unknown and mostly speculative. In placebo-controlled studies of antimigraine agents, adolescents were more likely to believe that the treatment received was an effective pain relieving medication than were adults [12]. A placebo effect by proxy may also be suggested in younger populations, since parents play an important role in reporting the outcome of their affected child [9]. The higher 50% responder rate observed in our study in children compared to adults may also partly reflect a regression to the mean effect. This regression to the mean effect might be greater in paediatric than in adults RCTs due to several factors, including the marked reluctance of parents to enrol their affected child in placebo-controlled trials [5], the trend observed in this meta-analysis toward shorter baseline duration in paediatric than in adult RCTs, and the possibility of greater short-term changes in seizure frequency in children than in adults.

In contrast to the difference in the RR of the 50% responder rate observed between children and adults, the RR of the seizure-free rate was found to be comparable in the two populations. Seizure-free rates in placebo groups were quite low in both children (0.6%) and adults (0.4%), suggesting that this outcome is insensitive to nonpharmacological effects. However, the seizure-free rate was also low in patients receiving AEDs (4.5% in children and 2.8% in adults), accounting for the fact that this outcome failed to show a significant difference between active treatment and placebo arms in the 11 series in which it was available. Thus, the seizure-free rate, though representing a more clinically relevant and less placebo-sensitive outcome than the 50% responder rate, appears inappropriate for Phase III RCTs in patients with drug-resistant partial epilepsy.

We observed a significantly lower RR of the withdrawal rate in children than in adults, primarily reflecting a greater dropout rate from placebo arms in the former population (13.3%) than in the latter (7%). This greater dropout rate in placebo-treated children might have theoretically contributed to the increased 50% responder rate observed in the same population. Indeed, according to the method of last observation carried forward used in all the selected RCTs, patients who withdraw early from the study because of adverse events might be more likely to achieve a 50% reduction in seizure frequency during the shorter time spent in the trial. However, this possibility does not seem to apply to our findings, since the greater withdrawal rate observed in children receiving placebo was primarily due to more frequent aggravation of seizures in these patients (5.6%) than in adults allocated to placebo (0.7%).

### Impacts on Future AEDs Trials in Paediatric Populations

The impact of our findings on future AED development programs in children needs to be emphasized. Recent reviews and guidelines have established that comprehensive drug development is needed in paediatric populations, including double-blind RCTs, but also have stressed the difficulties in achieving this goal [2,4]. Both the United States and the European Union have developed paediatric investigation plans, including financial incentives for pharmaceutical companies to perform specific drug trials in children [4,52,53]. These regulations aim at facilitating the development and use of medicinal products in children and at ensuring that medicinal products used to treat the paediatric population are subject to ethical, high-quality research [52]. These regulations also establish that the above objectives should be achieved without delaying the authorisation of medicinal products for other age populations [27,52] and without subjecting the paediatric population to unnecessary clinical trials [52]. In that context, one can hardly afford the risk of an underestimated sample size and related type II error that would result in a falsely negative trial. In fact, two of the five selected RCTs performed in children with drug-resistant partial epilepsy failed to demonstrate a significant difference in the 50% responder rate between the active drug (GBP and TPM) and placebo [54,55], whereas adults trials with the same AEDs and comparable or slightly lower sample sizes all demonstrated significant differences in 50% responder rate between active treatment and placebo [56–58]. It would also be unethical to grossly overestimate the number of children to be included in a double-blind, placebo-controlled

study, in order to ensure sufficient statistical power. We thus need to provide as much precise data as we can to optimally design paediatric RCTs in drug-resistant partial epilepsy. According to the results of this meta-analysis, we recommend calculating statistical power for paediatric RCTs on the premise of a 50% responder rate comparable to that observed in adults for the active treatment group, and of 20% (or twice that observed in the adult RCTs for the same AED) for placebo.

The value of add-on placebo-controlled RCTs in children with drug-resistant partial epilepsy may also be in question. Other trial designs such as the comparison of low and high doses of the same drug [59] or response-conditional design [60–63] have been proposed, but both have possible statistical [8] or ethical issues [62]. Thus, it is likely that classic add-on placebo-controlled RCTs will continue to be used for the development of AEDs in the near future, and will benefit from more precise knowledge regarding the response to placebo in the paediatric population.

### Supporting Information

**Alternative Language Abstract S1.** Translation of the Abstract into French by Sylvain Rheims

Found at doi:10.1371/journal.pmed.0050166.sd001 (23 KB DOC).

**Figure S1.** Analysis of the 50% Responders Rate Restricted to Comparable Dosages

(A) RR of 50% responder rate in adult and paediatric trials and comparison of RR of 50% responder rate in children and adults.

(B) Mean 50% responder rate with placebo and with AED in adult and paediatric trials. \*  $p < 0.001$  (logistic regression).

$I^2$ , point estimates of Higgins  $I^2$  with confidence interval; k, total number of trials; n, total number of patients; p Het, value of the heterogeneity test; p TE, value of the treatment effect test.

Found at doi:10.1371/journal.pmed.0050166.sg001 (83 KB PDF).

**Text S1.** Protocol for the Review

Found at doi:10.1371/journal.pmed.0050166.sd002 (53 KB DOC).

**Text S2.** QUOROM Checklist

Found at doi:10.1371/journal.pmed.0050166.sd003 (48 KB PDF).

**Text S3.** Search Strategy

Found at doi:10.1371/journal.pmed.0050166.sd004 (22 KB DOC).

**Text S4.** Detailed Characteristics of RCTs

Found at doi:10.1371/journal.pmed.0050166.sd005 (240 KB PDF).

### Acknowledgments

**Authors contributions.** SR and PR contributed to the protocol design, data extraction, and statistical analysis. MC contributed to the protocol design and statistical analysis. AA contributed to data analysis. All authors contributed to the writing and revision of the report.

### References

- Guerrini R (2006) Epilepsy in children. *Lancet* 367: 499–524.
- Garofalo E (2006) Obtaining pediatric indications for new anti-epileptic drugs: how and when. *Epilepsy Res* 68: 38–42.
- Schmidt B (2007) Clinical development of antiepileptic drugs in adults. *Neurotherapeutics* 4: 62–69.
- Caldwell PH, Murphy SB, Butow PN, Craig JC (2004) Clinical trials in children. *Lancet* 364: 803–811.
- Pellock JM (1998) Pediatric trials: practical issues. Special populations and trial design. *Adv Neurol* 76: 167–171.
- Steinbrook R (2002) Testing medications in children. *N Engl J Med* 347: 1462–1470.
- Perucca E (2006) Clinical pharmacokinetics of new-generation antiepileptic drugs at the extremes of age. *Clin Pharmacokinet* 45: 351–363.

8. Shinnar S, Pellock JM (2005) The trials and tribulations of pediatric drug trials. *Neurology* 65: 1348–1349.
9. Sandler A (2005) Placebo effects in developmental disabilities: implications for research and practice. *Ment Retard Dev Disabil Res Rev* 11: 164–170.
10. Fernandes R, Ferreira JJ, Sampaio C (2008) The placebo response in studies of acute migraine. *J Pediatr* 152: 527–33, 533.e.1
11. Lewis DW, Winner P, Wasiewski W (2005) The placebo responder rate in children and adolescents. *Headache* 45: 232–239.
12. Rothner AD, Wasiewski W, Winner P, Lewis D, Stankowski J (2006) Zolmitriptan oral tablet in migraine treatment: high placebo responses in adolescents. *Headache* 46: 101–109.
13. [No authors listed] (1993) Efficacy of felbamate in childhood epileptic encephalopathy (Lennox-Gastaut syndrome). The Felbamate Study Group in Lennox-Gastaut Syndrome. *N Engl J Med* 328: 29–33.
14. Beran RG, Berkovic SF, Dunagan FM, Vajda FJ, Danta G, et al. (1998) Double-blind, placebo-controlled, crossover study of lamotrigine in treatment-resistant generalised epilepsy. *Epilepsia* 39: 1329–1333.
15. Berkovic SF, Knowlton RC, Leroy RF, Schiemann J, Falter U (2007) Placebo-controlled study of levetiracetam in idiopathic generalized epilepsy. *Neurology* 69: 1751–1760.
16. Biton V, Montouris GD, Ritter F, Riviello JJ, Reife R, et al. (1999) A randomized, placebo-controlled study of topiramate in primary generalized tonic-clonic seizures. Topiramate YTC Study Group. *Neurology* 52: 1330–1337.
17. Biton V, Sackellares JC, Vuong A, Hammer AE, Barrett PS, et al. (2005) Double-blind, placebo-controlled study of lamotrigine in primary generalized tonic-clonic seizures. *Neurology* 65: 1737–1743.
18. Chadwick D, Leiderman DB, Sauermann W, Alexander J, Garofalo E (1996) Gabapentin in generalized seizures. *Epilepsy Res* 25: 191–197.
19. Glauser T, Kluger G, Sachdeo R, Krauss G, Perdomo C, et al. (2008) Rufinamide for generalized seizures associated with Lennox-Gastaut syndrome. *Neurology* 71: 1950–1958.
20. Motte J, Trevathan E, Arvidsson JF, Barrera MN, Mullens EL, et al. (1997) Lamotrigine for generalized seizures associated with the Lennox-Gastaut syndrome. Lamictal Lennox-Gastaut Study Group. *N Engl J Med* 337: 1807–1812.
21. Sachdeo RC, Glauser TA, Ritter F, Reife R, Lim P, et al. (1999) A double-blind, randomized trial of topiramate in Lennox-Gastaut syndrome. Topiramate YL Study Group. *Neurology* 52: 1882–1887.
22. [No authors listed] (1989) Proposal for revised classification of epilepsies and epileptic syndromes. Commission on Classification and Terminology of the International League Against Epilepsy. *Epilepsia* 30: 389–399.
23. French JA, Kanner AM, Bautista J, Abou-Khalil B, Browne T, et al. (2004) Efficacy and tolerability of the new antiepileptic drugs II: treatment of refractory epilepsy: report of the Therapeutics and Technology Assessment Subcommittee and Quality Standards Subcommittee of the American Academy of Neurology and the American Epilepsy Society. *Neurology* 62: 1261–1273.
24. Gumnit RJ, Walczak TS (2001) Guidelines for essential services, personnel, and facilities in specialized epilepsy centers in the United States. *Epilepsia* 42: 804–814.
25. Perruca E (1998) Pharmacoresistance in epilepsy: how should it be defined? *CNS Drugs* 10: 171–179.
26. Regesta G, Tanganelli P (1999) Clinical aspects and biological bases of drug-resistant epilepsies. *Epilepsy Res* 34: 109–122.
27. European Medicines Agency (2001) International Conference on Harmonisation. ICH topic E11 clinical investigation of medicinal products in the paediatric population. Available: <http://www.emea.eu/pdfs/human/ich/271199EN.pdf>. Accessed 07 July 2008.
28. Jadad AR, Moore RA, Carroll D, Jenkinson C, Reynolds DJ, et al. (1996) Assessing the quality of reports of randomized clinical trials: is blinding necessary? *Control Clin Trials* 17: 1–12.
29. Gazzola DM, Balcer LJ, French JA (2007) Seizure-free outcome in randomized add-on trials of the new antiepileptic drugs. *Epilepsia* 48: 1303–1307.
30. Higgins JP, Thompson SG (2002) Quantifying heterogeneity in a meta-analysis. *Stat Med* 21: 1539–1558.
31. Cucherat M (2001) EasyMA Software Version 2000. Available: <http://www.spc.univ-lyon1.fr/easyma.net/>. Accessed 07 July 08.
32. Cucherat M, Boissel JP, Leizorovicz A, Haugh MC (1997) EasyMA: a program for the meta-analysis of clinical trials. *Comput Methods Programs Biomed* 53: 187–190.
33. Rosenfeld W, Abou-Khalil B, Reife R, Hegadus R, Pledger G, et al. (1996) Placebo-controlled trial of topiramate as adjunctive therapy to carbamazepine or phenytoine for partial onset seizures. *Epilepsia* 37: 153.
34. Schmidt D, Ried RS, Rapp P (1993) Add-on treatment with Lamotrigine for intractable partial epilepsy: a placebo-controlled, cross-over trial. *Epilepsia* 34: 66.
35. Jette NJ, Marson AG, Hutton JL (2002) Topiramate add-on for drug-resistant partial epilepsy. *Cochrane Database Syst Rev* CD001417. Available: <http://www.cochrane.org/reviews/en/ab001417.html>. Accessed 07 July 08.
36. Ramaratnam S, Marson AG, Baker GA (2001) Lamotrigine add-on for drug-resistant partial epilepsy. *Cochrane Database Syst Rev* CD001909. Available: <http://www.cochrane.org/reviews/en/ab001909.html>. Accessed 07 July 08.
37. Duchowny M, Pellock JM, Graf WD, Billard C, Gilman J, et al. (1999) A placebo-controlled trial of lamotrigine add-on therapy for partial seizures in children. Lamictal Pediatric Partial Seizure Study Group. *Neurology* 53: 1724–1731.
38. Huedo-Medina TB, Sanchez-Meca F, Marin-Martinez F, Botella J (2006) Assessing heterogeneity in meta-analysis: Q statistic or I<sup>2</sup> index? *Psychol Methods* 11: 193–206.
39. Ioannidis J, Patsopoulos N, Evangelou E (2007) Uncertainty in heterogeneity estimates in meta-analyses. *BMJ* 335: 914–916.
40. Hoppe C, Poepel A, Elger CE (2007) Epilepsy: accuracy of patient seizure counts. *Arch Neurol* 64: 1595–1599.
41. Kerling F, Mueller S, Pauli E, Stefan H (2006) When do patients forget their seizures? An electroclinical study. *Epilepsy Behav* 9: 281–285.
42. Castillo S, Schmidt DB, White S (2000) Oxcarbazepine add-on for drug-resistant partial epilepsy. *Cochrane Database Syst Rev* CD002028. Available: <http://www.cochrane.org/reviews/en/ab002028.html>. Accessed 07 July 08.
43. Chadwick DW, Marson AG (2005) Zonisamide add-on for drug-resistant partial epilepsy. *Cochrane Database Syst Rev* CD001416. Available: <http://www.cochrane.org/reviews/en/ab001416.html>. Accessed 07 July 08.
44. Chaisewikul R, Privitera MD, Hutton JL, Marson AG (2001) Levetiracetam add-on for drug-resistant localization related (partial) epilepsy. *Cochrane Database Syst Rev* CD001901. <http://www.cochrane.org/reviews/en/ab001901.html>. Accessed 07 July 08.
45. Leach JP, Marson AG, Hutton JL (2002) Remacemide for drug-resistant localization related epilepsy. *Cochrane Database Syst Rev* CD001900. Available: <http://www.cochrane.org/reviews/en/ab001900.html>. Accessed 07 July 08.
46. Lozsadi D, Hemming K, Marson A (2008) Pregabalin add-on for drug-resistant partial epilepsy. *Cochrane Database Syst Rev* CD005612. Available: <http://www.cochrane.org/reviews/en/ab005612.html>. Accessed 07 July 08.
47. Marson AG, Kadir ZA, Hutton JL, Chadwick DW (2000) Gabapentin add-on for drug-resistant partial epilepsy. *Cochrane Database Syst Rev* CD001415. Available: <http://www.cochrane.org/reviews/en/ab001415.html>. Accessed 07 July 08.
48. Pereira J, Marson AG, Hutton JL (2002) Tiagabine add-on for drug-resistant partial epilepsy. *Cochrane Database Syst Rev* CD001908. Available: <http://www.cochrane.org/reviews/en/ab001908.html>. Accessed 07 July 08.
49. Marson AG, Hutton JL, Leach JP, Castillo S, Schmidt D, et al. (2001) Levetiracetam, oxcarbazepine, remacemide and zonisamide for drug resistant localization-related epilepsy: a systematic review. *Epilepsy Res* 46: 259–270.
50. Marson AG, Kadir ZA, Hutton JL, Chadwick DW (1997) The new antiepileptic drugs: a systematic review of their efficacy and tolerability. *Epilepsia* 38: 859–880.
51. Otoul C, Arrigo C, van Rijckevorsel K, French JA (2005) Meta-analysis and indirect comparisons of levetiracetam with other second-generation antiepileptic drugs in partial epilepsy. *Clin Neuropharmacol* 28: 72–78.
52. [No authors listed] (2006) Regulation (EC) No 1901/2006 of the European Parliament and of the Council of 12 December 2006 on medicinal products for paediatric use. Official Journal of the European Union. Available: [http://ec.europa.eu/enterprise/pharmaceuticals/eudralex/vol-1/reg\\_2006\\_1901/reg\\_2006\\_1901\\_en.pdf](http://ec.europa.eu/enterprise/pharmaceuticals/eudralex/vol-1/reg_2006_1901/reg_2006_1901_en.pdf). Accessed 07 July 08.
53. National Institutes of Health (1998) NIH policy and guidelines on the inclusion of children as participants in research involving human subjects. Available: <http://grants.nih.gov/grants/guide/notice-files/not98-024.html>. Accessed 07 July 08.
54. Appleton R, Fichtner K, LaMoreaux L, Alexander J, Halsall G, et al. (1999) Gabapentin as add-on therapy in children with refractory partial seizures: a 12-week, multicentre, double-blind, placebo-controlled study. Gabapentin Paediatric Study Group. *Epilepsia* 40: 1147–1154.
55. Elterman RD, Glauser TA, Wyllie E, Reife R, Wu SC, et al. (1999) A double-blind, randomized trial of topiramate as adjunctive therapy for partial-onset seizures in children. Topiramate YP Study Group. *Neurology* 52: 1338–1344.
56. Anhut H, Ashman P, Feuerstein TJ, Sauermann W, Saunders M, et al. (1994) Gabapentin (Neurontin) as add-on therapy in patients with partial seizures: a double-blind, placebo-controlled study. The International Gabapentin Study Group. *Epilepsia* 35: 795–801.
57. Tassinari CA, Michelucci R, Chauvel P, Chodkiewicz J, Shorvon S, et al. (1996) Double-blind, placebo-controlled trial of topiramate (600 mg daily) for the treatment of refractory partial epilepsy. *Epilepsia* 37: 763–768.
58. Yamauchi T, Kaneko S, Yagi K, Sase S (2006) Treatment of partial seizures with gabapentin: double-blind, placebo-controlled, parallel-group study. *Psychiatry Clin Neurosci* 60: 507–515.
59. Pina-Garza JE, Espinoza R, Nordli D, Bennett DA, Spirito S, et al. (2005) Oxcarbazepine adjunctive therapy in infants and young children with partial seizures. *Neurology* 65: 1370–1375.
60. Chiron C, Tonnelier S, Rey E, Brunet ML, Tran A, et al. (2006) Stiripentol in childhood partial epilepsy: randomized placebo-controlled trial with enrichment and withdrawal design. *J Child Neurol* 21: 496–502.

61. Chiron C, Dulac O, Gram L (1996) Vigabatrin withdrawal randomized study in children. *Epilepsia Res* 25: 209–215.
62. Chiron C, Dulac O, Pons G (2008) Antiepileptic drug development in children: considerations for a revisited strategy. *Drugs* 68: 17–25.
63. Pina-Garza JE, Levisohn P, Gucuyener K, Mikati MA, Warnock CR, et al. (2007) Adjunctive lamotrigine for partial seizures in patients aged 1 to 24 months. *Neurology*
64. [No authors listed] (1990) Gabapentin in partial epilepsy. UK Gabapentin Study Group. *Lancet* 335: 1114–1117.
65. Sivenius J, Kalviainen R, Ylinen A, Riekkinen P (1991) Double-blind study of Gabapentin in the treatment of partial seizures. *Epilepsia* 32: 539–542.
66. [No authors listed] (1993) Gabapentin as add-on therapy in refractory partial epilepsy: a double-blind, placebo-controlled, parallel-group study. The US Gabapentin Study Group No. 5. *Neurology* 43: 2292–2298.
67. Binnie CD, Debets RM, Engelsman M, Meijer JW, Meinardi H, et al. (1989) Double-blind crossover trial of lamotrigine (Lamictal) as add-on therapy in intractable epilepsy. *Epilepsia Res* 4: 222–229.
68. Jawad S, Richens A, Goodwin G, Yuen WC (1989) Controlled trial of lamotrigine (Lamictal) for refractory partial seizures. *Epilepsia* 30: 356–363.
69. Loiseau P, Yuen AW, Duche B, Menager T, Arne-Bes MC (1990) A randomised double-blind placebo-controlled crossover add-on trial of lamotrigine in patients with treatment-resistant partial seizures. *Epilepsia Res* 7: 136–145.
70. Matsuo F, Bergen D, Faught E, Messenheimer JA, Dren AT, et al. (1993) Placebo-controlled study of the efficacy and safety of lamotrigine in patients with partial seizures. U.S. Lamotrigine Protocol 0.5 Clinical Trial Group. *Neurology* 43: 2284–2291.
71. Schapel GJ, Beran RG, Vajda FJ, Berkovic SF, Mashford ML, et al. (1993) Double-blind, placebo controlled, crossover study of lamotrigine in treatment resistant partial seizures. *J Neurol Neurosurg Psychiatry* 56: 448–453.
72. Smith D, Baker G, Davies G, Dewey M, Chadwick DW (1993) Outcomes of add-on treatment with lamotrigine in partial epilepsy. *Epilepsia* 34: 312–322.
73. Messenheimer J, Ramsay RE, Willmore LJ, Leroy RF, Zielinski JJ, et al. (1994) Lamotrigine therapy for partial seizures: a multicenter, placebo-controlled, double-blind, cross-over trial. *Epilepsia* 35: 113–121.
74. Boas J, Dam M, Friis ML, Kristensen O, Pedersen B, et al. (1996) Controlled trial of lamotrigine (Lamictal) for treatment-resistant partial seizures. *Acta Neurol Scand* 94: 247–252.
75. Ben-Menachem E, Falter U (2000) Efficacy and tolerability of levetiracetam 3000 mg/d in patients with refractory partial seizures: a multicenter, double-blind, responder-selected study evaluating monotherapy. European Levetiracetam Study Group. *Epilepsia* 41: 1276–1283.
76. Cereghino JJ, Biton V, Abou-Khalil B, Dreifuss F, Gauer LJ, et al. (2000) Levetiracetam for partial seizures: results of a double-blind, randomized clinical trial. *Neurology* 55: 236–242.
77. Shorvon SD, Lowenthal A, Janz D, Bielen E, Loiseau P (2000) Multicenter double-blind, randomized, placebo-controlled trial of levetiracetam as add-on therapy in patients with refractory partial seizures. European Levetiracetam Study Group. *Epilepsia* 41: 1179–1186.
78. Tsai JJ, Yen DJ, Hsieh MS, Chen SS, Hiersemenzel R, et al. (2006) Efficacy and safety of levetiracetam (up to 2000 mg/day) in Taiwanese patients with refractory partial seizures: a multicenter, randomized, double-blind, placebo-controlled study. *Epilepsia* 47: 72–81.
79. Glauser TA, Ayala R, Elterman RD, Mitchell WC, Van Orman CB, et al. (2006) Double-blind placebo-controlled trial of adjunctive levetiracetam in pediatric partial seizures. *Neurology* 66: 1654–1660.
80. Barcs G, Walker EB, Elger CE, Scaramelli A, Stefan H, et al. (2000) Oxcarbazepine placebo-controlled, dose-ranging trial in refractory partial epilepsy. *Epilepsia* 41: 1597–1607.
81. Glauser TA, Nigro M, Sachdeo R, Pasteris LA, Weinstein S, et al. (2000) Adjunctive therapy with oxcarbazepine in children with partial seizures. The Oxcarbazepine Pediatric Study Group. *Neurology* 54: 2237–2244.
82. Ben-Menachem E, Henriksen O, Dam M, Mikkelsen M, Schmidt D, et al. (1996) Double-blind, placebo-controlled trial of topiramate as add-on therapy in patients with refractory partial seizures. *Epilepsia* 37: 539–543.
83. Faught E, Wilder BJ, Ramsay RE, Reife RA, Kramer LD, et al. (1996) Topiramate placebo-controlled dose-ranging trial in refractory partial epilepsy using 200-, 400-, and 600-mg daily dosages. Topiramate YD Study Group. *Neurology* 46: 1684–1690.
84. Privitera M, Fincham R, Penry J, Reife R, Kramer L, et al. (1996) Topiramate placebo-controlled dose-ranging trial in refractory partial epilepsy using 600-, 800-, and 1,000-mg daily dosages. Topiramate YE Study Group. *Neurology* 46: 1678–1683.
85. Sharief M, Viteri C, Ben-Menachem E, Weber M, Reife R, et al. (1996) Double-blind, placebo-controlled study of topiramate in patients with refractory partial epilepsy. *Epilepsia Res* 25: 217–224.
86. Korean (1999) Topiramate in medically intractable partial epilepsies: double-blind placebo-controlled randomized parallel group trial. Korean Topiramate Study Group. *Epilepsia* 40: 1767–1774.
87. Yen DJ, Yu HY, Guo YC, Chen C, Yiu CH, et al. (2000) A double-blind, placebo-controlled study of topiramate in adult patients with refractory partial epilepsy. *Epilepsia* 41: 1162–1166.

## Editors' Summary

**Background.** Whenever an adult is given a drug to treat a specific condition, that drug will have been tested in “randomized controlled trials” (RCTs). In RCTs, a drug's effects are compared to those of another drug for the same condition (or to a placebo, dummy drug) by giving groups of adult patients the different treatments and measuring how well each drug deals with the condition and whether it has any other effects on the patients' health. However, many drugs given to children have only been tested in adults, the assumption being that children can safely take the same drugs as adults provided the dose is scaled down. This approach to treatment is generally taken in epilepsy, a common brain disorder in children in which disruptions in the electrical activity of part (partial epilepsy) or all (generalized epilepsy) of the brain cause seizures. The symptoms of epilepsy depend on which part of the brain is disrupted and can include abnormal sensations, loss of consciousness, or convulsions. Most but not all patients can be successfully treated with antiepileptic drugs, which reduce or stop the occurrence of seizures.

**Why Was This Study Done?** It is increasingly clear that children and adults respond differently to many drugs, including antiepileptic drugs. For example, children often break down drugs differently from adults, so a safe dose for an adult may be fatal to a child even after scaling down for body size, or it may be ineffective because of quicker clearance from the child's body. Consequently, regulatory bodies around the world now require comprehensive drug development programs in children as well as in adults. However, for pediatric trials to yield useful results, the general differences in the treatment response between children and adults must first be determined and then allowed for in the design of pediatric RCTs. In this study, the researchers investigate whether there is any evidence in published RCTs for age-dependent differences in the response to antiepileptic drugs in drug-resistant partial epilepsy.

**What Did the Researchers Do and Find?** The researchers searched the literature for reports of RCTs on the effects of antiepileptic drugs in the add-on treatment of drug-resistant partial epilepsy in children and in adults—that is, trials that compared the effects of giving an additional antiepileptic drug with those of giving a placebo by asking what fraction of patients given each treatment had a 50% reduction in seizure frequency during the treatment period compared to a baseline period (the “50% responder rate”). This “systematic review” yielded 32 RCTs, including five pediatric RCTs. The researchers then compared the treatment effect (the ratio of the 50% responder rate in the treatment arm to the placebo arm) in the two age groups using a statistical

approach called “meta-analysis” to pool the results of these studies. The treatment effect, they report, was significantly lower in children than in adults. Further analysis indicated that this difference was because more children than adults responded to the placebo. Nearly 1 in 5 children had a 50% reduction in seizure rate when given a placebo compared to only 1 in 10 adults. About a third of both children and adults had a 50% reduction in seizure rate when given antiepileptic drugs.

**What Do These Findings Mean?** These findings, although limited by the small number of pediatric trials done so far, suggest that children with drug-resistant partial epilepsy respond more strongly in RCTs to placebo than adults. Although additional studies need to be done to find an explanation for this observation and to discover whether anything similar occurs in other conditions, this difference between children and adults should be taken into account in the design of future pediatric trials on the effects of antiepileptic drugs, and possibly drugs for other conditions. Specifically, to reduce the risk of false-negative results, this finding suggests that it might be necessary to increase the size of future pediatric trials to ensure that the trials have enough power to discover effects of the drugs tested, if they exist.

**Additional Information.** Please access these Web sites via the online version of this summary at <http://dx.doi.org/10.1371/journal.pmed.0050166>.

- This study is further discussed in a *PLoS Medicine* Perspective by Terry Klassen and colleagues
- The European Medicines Agency provides information about the regulation of medicines for children in Europe
- The US Food and Drug Administration Office of Pediatric Therapeutics provides similar information for the US
- The UK Medicines and Healthcare products Regulatory Agency also provides information on why medicines need to be tested in children
- The MedlinePlus encyclopedia has a page on epilepsy (in English and Spanish)
- The US National Institute for Neurological Disorders and Stroke and the UK National Health Service Direct health encyclopedia both provide information on epilepsy for patients (in several languages)
- Neuroscience for Kids is an educational Web site prepared by Eric Chudler (University of Washington, Seattle, US) that includes information on epilepsy and a list of links to epilepsy organizations (mainly in English but some sections in other languages as well)
